# Supplementary material
Source: publisher figshare collection journal article supplement (https://springernature.figshare.com/ndownloader/files/20589102)
Supplement: Supplementary file [file 20589102]

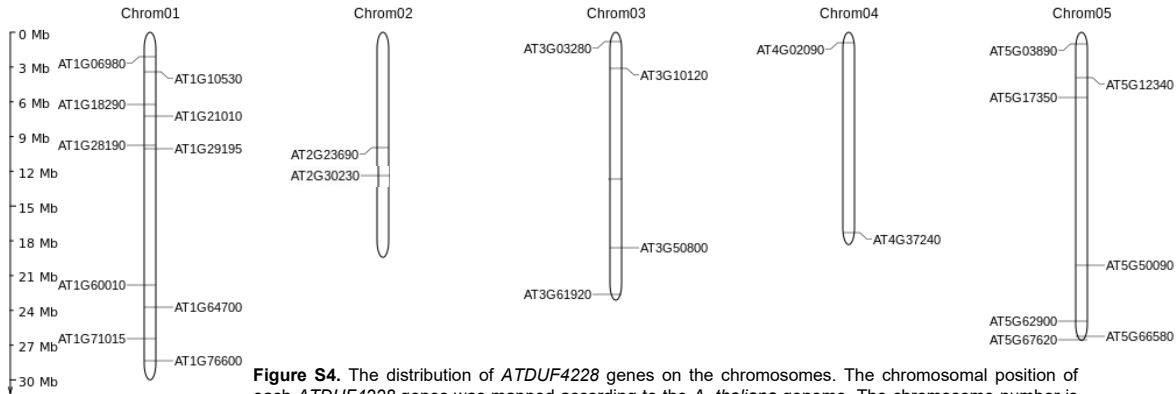

**Figure S4.** The distribution of *ATDUF4228* genes on the chromosomes. The chromosomal position of each *ATDUF4228* genes was mapped according to the *A. thaliana* genome. The chromosome number is indicated at the top of each chromosome.
